# Supplementary material for: Unexpected compositional and structural modification of CoPt3nanoparticles by extensive surface purification
Source: Royal Society of Chemistry journal article supplement (doi:10.1039/c8nr00060c), 2018-01-01
Supplement: c8nr00060c1.pdf [file c8nr00060c1.pdf]

## Supporting Information

# Unexpected Compositional and Structural Modification of CoPt<sub>3</sub> Nanoparticles by Extensive Surface Purification

Martín D. Mizrahi,<sup>a</sup> Galyna Krylova,<sup>b</sup> Lisandro J. Giovanetti,<sup>a</sup> José M. Ramallo-López,<sup>a</sup> Yuzi Liu,<sup>b</sup> Elena V. Shevchenko,<sup>b\*</sup> and Félix G. Requejo<sup>a\*</sup>

<sup>a</sup>INIFTA, CONICET and Dpto. Química, Facultad de Ciencias Exactas, Universidad Nacional de La Plata, P.O. Box 16, Suc. 4, 1900 La Plata, Buenos Aires, Argentina,

<sup>b</sup>Center for Nanoscale Materials, Argonne National Laboratory, Argonne, Illinois 60439 USA.

**Corresponding authors:** Elena V. Shevchenko (eshevchenko@anl.gov) and Felix G. Requejo (felix.requejo@gmail.com).

**Coordination numbers analysis:** Figure 1S shows the calculated average coordination numbers ( $N_{PtPt}$  and  $N_{PtCo}$ ) for a core/shell NP with Pt metallic core and a CoPt<sub>3</sub> alloy shell. Vertical red and blue bars indicate the range of consistence between theoretical and EXAFS results. From these figures it is clear that using the Pt/CoPt<sub>3</sub> model, it is impossible to find a region of the core radius to fulfill experimental data on coordination numbers.

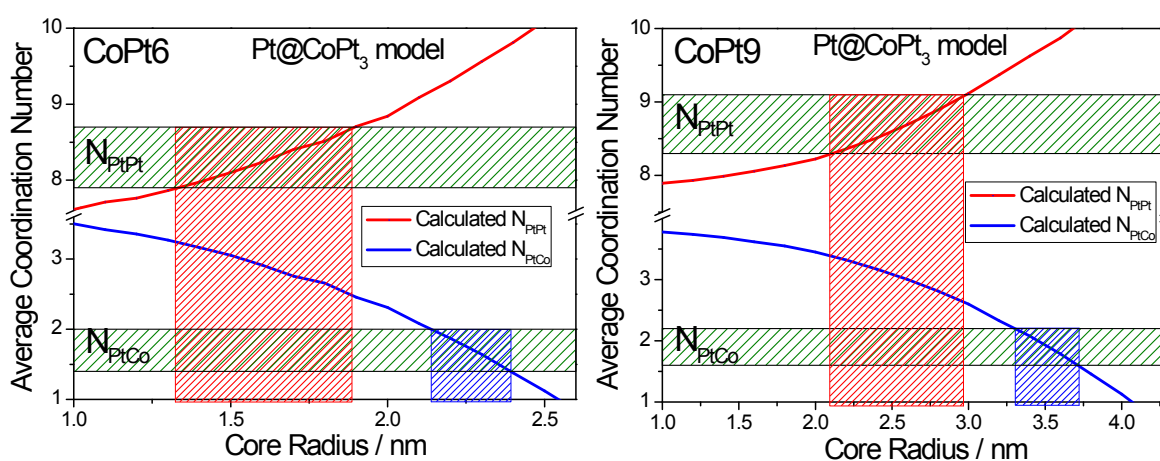

**Figure S1.** Pt/CoPt<sub>3</sub> core/shell model: calculated average coordination numbers  $N_{PtPt}$  (red line) and  $N_{PtCo}$  (blue line) as function of Pt core radius for 5.9 nm and 9.3 nm NPs (left and right images, respectively). The green horizontal bars represent the average coordination numbers obtained by the EXAFS fits, and the vertical red and blue bars indicate the region of the core radius for the matching between theoretical and EXAFS values of the  $N_{PtPt}$  and  $N_{PtCo}$ .

Figure S2 shows the calculated average coordination numbers ( $N_{PtPt}$  and  $N_{PtCo}$ ) for a random distribution of Pt and Co atoms in a *fcc* structure. For both samples we used the Pt/Co ratios obtained from the fits of the corresponding fluorescence spectra. Vertical black lines indicate the average particle radius obtained by the analysis of TEM images. For these radii the calculated average coordination numbers do not match to the estimates of the EXAFS fits.

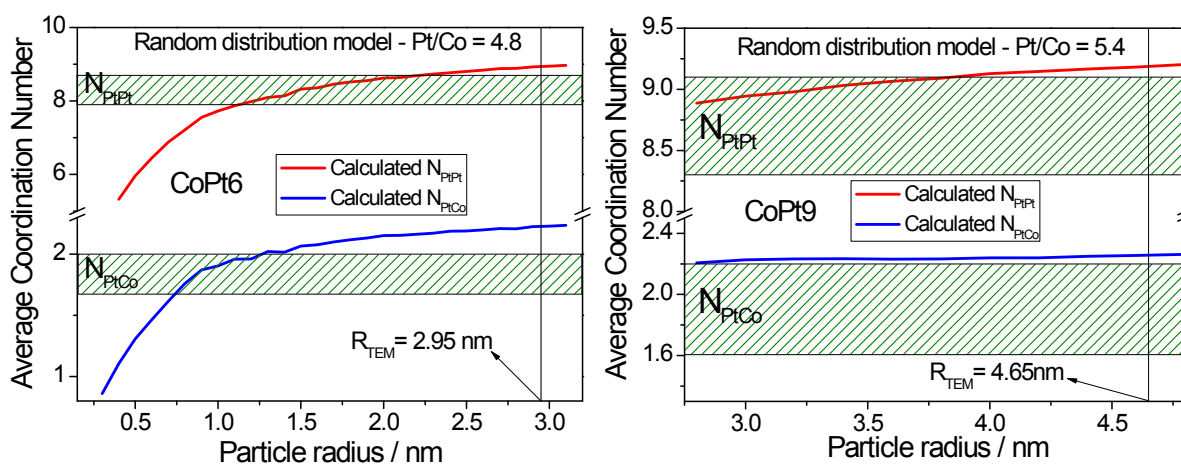

**Figure S2.** Calculated average coordination numbers  $N_{PtPt}$  (red line) and  $N_{PtCo}$  (blue line) as function of core radius for a random distribution of Pt and Co atoms, with the Pt/Co ratio obtained by fluorescence measurements for 5.9 nm and 9.3 nm NPs (left and right images, respectively). The green horizontal bars represent the average coordination numbers obtained by the EXAFS fits, and the vertical black line indicates the particle average radius obtained by TEM.

**Co K-edge XANES analysis:** Co K-edge XANES technique is a sensible tool to identify Co species in small crystalline domains.<sup>1</sup> Figure S3 presents the Co K-edge absorption spectra of the 9.3 nm CoPt<sub>3</sub> NPs before and after extensive purification, as well as spectra corresponding to metallic Co, CoO, Co<sub>3</sub>O<sub>4</sub> and CoPt<sub>3</sub> reference samples. The absorption edge at 7709 eV corresponds to the electronic transition from 1s to 3d states, whereas the maximum at the white line at 7725 eV is due to electronic transition from 1s to 4p.<sup>2</sup> The XANES spectra of CoPt<sub>3</sub> alloy reference compound and extensively purified CoPt<sub>3</sub> NP samples revealed the same characteristic feature at the edge and the two main resonances at 7709 and 7725 eV, and a third one at 7750 eV (in both energy and intensity). On the contrary, the spectrum of as-synthesized CoPt<sub>3</sub> sample is noticeably different than that of extensively purified NPs. The Co K-edge EXAFS study on as-synthesized CoPt<sub>3</sub> NP indicate the presence of additional coordination shells for Co with Co-Co and Co-O contributions (Figure S3b, Table S1) that is consistent with the presence of oxidized Co atoms at the surface of the as-synthesized NPs.

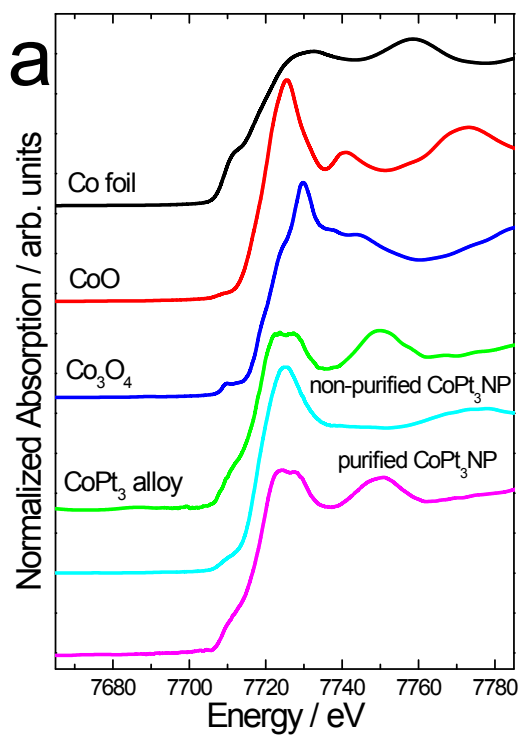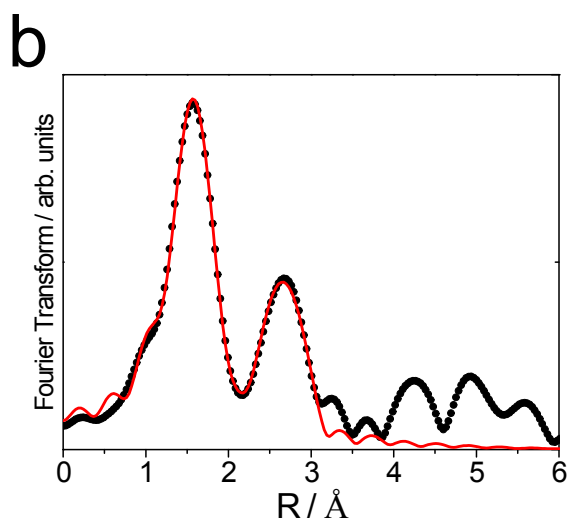

**Figure S3.** a) Co K-edge XANES spectra 9 nm CoPt<sub>3</sub> NP before and after purification, compared with metallic Co foil, CoO, Co<sub>3</sub>O<sub>4</sub> and CoPt<sub>3</sub> reference compounds. b) Experimental Fourier transform of the EXAFS oscillations at the Co-K edge (dotted line) and the corresponding fits (red line) for non-purified CoPt<sub>3</sub> sample (corresponding data and fittings for purified sample are showed in Figure 2 and Table 1 respectively in the manuscript).

| Coordination shell | Non-purified CoPt <sub>3</sub> NP sample |                            |
|--------------------|------------------------------------------|----------------------------|
|                    | Average Coordination number N            | Interatomic distance R (Å) |
| Co - O             | 2.8 <sub>4</sub>                         | 2.04 <sub>1</sub>          |
| Co - Co            | 1.2 <sub>4</sub>                         | 3.07 <sub>3</sub>          |
| Co - Pt            | 3.3 <sub>8</sub>                         | 2.68 <sub>3</sub>          |

**Table S1.** Structural parameters obtained from the EXAFS fits at the Co-K edge for non-purified CoPt<sub>3</sub> NPs. Subscript number represent the error in the last digit.

References:

1 - Wei-Feng Huang, Qian Zhang, Dong-Feng Zhang, Jing Zhou, Cheng Si, Lin Guo, Wang-Sheng Chu, and Zi-Yu Wu. *J. Phys. Chem. C* 2013, 117, 6872–6879.

2 - Zhang, G.; Wu, Z.; Li, A.; Wang, Y.; Zhang, J.; Abbas, M.; Hu, R.; Ni, X.; Tong, Y.; Hu, Y. *Phys. Rev. B* 2004, 69, 115405; Lai, F.-J.; Sarma, L. S.; Chou, H.-L.; Liu, D.-G.; Hsieh, C.-A.; Lee, J.-F.; Hwang, B.-J. *J. Phys. Chem. C* 2009, 113, 12674–12681.

References:

1 - Wei-Feng Huang, Qian Zhang, Dong-Feng Zhang, Jing Zhou, Cheng Si, Lin Guo, Wang-Sheng Chu, and Zi-Yu Wu. *J. Phys. Chem. C* 2013, 117, 6872–6879.

2 - Zhang, G.; Wu, Z.; Li, A.; Wang, Y.; Zhang, J.; Abbas, M.; Hu, R.; Ni, X.; Tong, Y.; Hu, Y. *Phys. Rev. B* 2004, 69, 115405; Lai, F.-J.; Sarma, L. S.; Chou, H.-L.; Liu, D.-G.; Hsieh, C.-A.; Lee, J.-F.; Hwang, B.-J. *J. Phys. Chem. C* 2009, 113, 12674–12681.
